# Supplementary material
Source: HighWire-hosted journal article supplement (https://www.jrheum.org/highwire/filestream/39065/field_highwire_adjunct_files/0/191117DataSuppl.pdf)
Supplement: 191117DataSuppl.pdf [file 191117DataSuppl.pdf]

**ONLINE SUPPLEMENTARY MATERIAL**

**Supplementary Table 1.** Demographics, clinical characteristics, and treatment profiles of patients with PsA and without fibromyalgia in the Corrona PsA/SpA Registry at their enrollment visit, stratified by location of SPARCC enthesitis sites.

| Characteristic                      | Patients Without Enthesitis (n = 1557) | Patients With Enthesitis               |                           |                            |                                      |
|-------------------------------------|----------------------------------------|----------------------------------------|---------------------------|----------------------------|--------------------------------------|
|                                     |                                        | All Patients With Enthesitis (n = 349) | Upper Sites Only (n = 71) | Lower Sites Only (n = 120) | Both Upper and Lower Sites (n = 158) |
| Age, mean (SD), years               | 53.8 (13.3))                           | 52.6 (12.8)                            | 51.9 (12.8)               | 50.4 (12.5)*               | 54.6 (12.7)                          |
| Female, n (%)                       | 745 (48.4)                             | 209 (60.2)*                            | 35 (49.3)                 | 64 (53.8)                  | 110 (70.1)*                          |
| White, n (%)                        | 1418 (94.5)                            | 320 (93.6)                             | 66 (97.1)                 | 110 (92.4)                 | 144 (92.9)                           |
| BMI, mean (SD), kg/m <sup>2</sup>   | 31.5 (7.3)                             | 31.4 (7.0)                             | 29.9 (5.9)                | 31.1 (6.1)                 | 32.4 (7.8)                           |
| Marital status, n (%)               |                                        |                                        |                           |                            |                                      |
| Single                              | 238 (15.5)                             | 43 (12.5)                              | 10 (14.5)                 | 16 (13.4) <sup>†</sup>     | 17 (10.9)                            |
| Married                             | 1055 (68.6)                            | 239 (69.5)                             | 45 (65.2)                 | 82 (68.9) <sup>†</sup>     | 112 (71.8)                           |
| Partnered                           | 18 (1.2)                               | 9 (2.6)                                | 1 (1.4)                   | 5 (4.2) <sup>†</sup>       | 3 (1.9)                              |
| Widowed                             | 72 (4.7)                               | 10 (2.9)                               | 2 (2.9)                   | 1 (0.8) <sup>†</sup>       | 7 (4.5)                              |
| Separated                           | 16 (1.0)                               | 2 (0.6)                                | 11 (15.9)                 | 1 (0.8) <sup>†</sup>       | 1 (0.6)                              |
| Divorced                            | 140 (9.1)                              | 41 (11.9)                              | 0                         | 14 (11.8) <sup>†</sup>     | 16 (10.3)                            |
| Patient-reported work status, n (%) |                                        |                                        |                           |                            |                                      |
| Full time                           | 854 (55.6)                             | 198 (57.2)                             | 44 (63.8)                 | 75 (62.5) <sup>†</sup>     | 79 (50.3)                            |
| Part time                           | 130 (8.5)                              | 31 (9.0)                               | 7 (10.1)                  | 10 (8.3) <sup>†</sup>      | 14 (8.9)                             |

|                                                            |             |                         |                        |                        |                        |
|------------------------------------------------------------|-------------|-------------------------|------------------------|------------------------|------------------------|
| Disabled                                                   | 120 (7.8)   | 33 (9.5)                | 1 (1.4)                | 13 (10.8) <sup>†</sup> | 19 (12.1)              |
| Retired                                                    | 334 (21.7)  | 61 (17.6)               | 12 (17.4)              | 15 (12.5) <sup>†</sup> | 34 (21.7)              |
| Other                                                      | 98 (6.4)    | 23 (6.6)                | 5 (7.2)                | 7 (5.8) <sup>†</sup>   | 11 (7.0)               |
| Symptom duration, mean (SD), years                         | 11.4 (10.4) | 10.8 (10.0)             | 10.5 (9.6)             | 9.8 (9.6)              | 11.8 (10.5)            |
| Disease duration, mean (SD), years                         | 8.7 (9.0)   | 7.0 (8.0)*              | 6.8 (7.7)              | 6.4 (7.8)*             | 7.6 (8.4)              |
| Physician-reported history of comorbid conditions, n (%)   |             |                         |                        |                        |                        |
| Psoriasis                                                  | 1358 (87.2) | 319 (91.4)*             | 66 (93.0)              | 110 (91.7)             | 143 (90.5)             |
| Cardiovascular disease                                     | 769 (49.4)  | 172 (49.3)              | 36 (50.7)              | 53 (44.2)              | 83 (52.5)              |
| Hypertension                                               | 562 (36.1)  | 126 (36.1)              | 23 (32.4)              | 41 (34.2)              | 62 (39.2)              |
| Nail psoriasis                                             | 430 (27.6)  | 153 (43.8)*             | 38 (53.5)*             | 36 (30.0)              | 79 (50.0)*             |
| Hyperlipidemia                                             | 374 (24.0)  | 79 (22.6)               | 17 (23.9)              | 24 (20.0)              | 38 (24.1)              |
| Depression                                                 | 175 (11.2)  | 56 (16.0)               | 7 (9.9)                | 25 (20.8)*             | 24 (15.2)              |
| History of biologic use, n (%)                             | 384 (24.7)  | 124 (35.5)*             | 21 (29.6)              | 43 (35.8)*             | 60 (38.0)*             |
| No. of prior biologics, n (%)                              |             |                         |                        |                        |                        |
| 0                                                          | 1173 (75.3) | 225 (64.5) <sup>†</sup> | 50 (70.4) <sup>†</sup> | 77 (64.2) <sup>†</sup> | 98 (62.0) <sup>†</sup> |
| 1                                                          | 259 (16.6)  | 81 (23.2) <sup>†</sup>  | 19 (26.8) <sup>†</sup> | 26 (21.7) <sup>†</sup> | 36 (22.8) <sup>†</sup> |
| ≥ 2                                                        | 125 (8.0)   | 43 (12.3) <sup>†</sup>  | 2 (2.8) <sup>†</sup>   | 17 (14.2) <sup>†</sup> | 24 (15.2) <sup>†</sup> |
| History of csDMARD use, n (%)                              | 350 (22.5)  | 113 (32.4)              | 23 (32.4)              | 40 (33.3)*             | 50 (31.6)*             |
| History of tsDMARD use, n (%)                              | 22 (1.4)    | 12 (3.4)*               | 2 (2.8)                | 4 (3.3)                | 6 (3.8)                |
| Current csDMARD use only (no biologics or tsDMARDs), n (%) | 428 (27.5)  | 77 (22.1)               | 18 (25.4)              | 20 (16.7)*             | 39 (24.7)              |

\*  $p < 0.05$  for comparison between the overall or location enthesitis groups and the no enthesitis group. †  $p < 0.05$  for comparison of overall distribution across categories between the overall or location enthesitis groups and the no enthesitis group. BMI: body mass index; csDMARD: conventional synthetic disease-modifying antirheumatic drug; SPARCC: Spondyloarthritis Research Consortium of Canada; tsDMARD: targeted synthetic disease-modifying antirheumatic drug.

**Supplementary Table 2.** Disease activity, QOL, and work productivity of patients with PsA and without fibromyalgia in the Corrona PsA/SpA Registry at their enrollment visit, stratified by location of SPARCC enthesitis sites.

| Characteristic*                         | Patients Without Enthesitis (n = 1557) | Patients With Enthesitis               |                           |                            |                                      |
|-----------------------------------------|----------------------------------------|----------------------------------------|---------------------------|----------------------------|--------------------------------------|
|                                         |                                        | All Patients With Enthesitis (n = 349) | Upper Sites Only (n = 71) | Lower Sites Only (n = 120) | Both Upper and Lower Sites (n = 158) |
| Modified MDA, n (%)                     | 407 (31.7)                             | 27 (9.0)                               | 6 (9.8) <sup>†</sup>      | 13 (12.5) <sup>†</sup>     | 8 (5.9) <sup>†</sup>                 |
| Tender joint count (0-68)               | 2.7 (5.4)                              | 11.7 (12.2)                            | 8.4 (9.2) <sup>†</sup>    | 7.1 (9.3) <sup>†</sup>     | 16.5 (13.4) <sup>†</sup>             |
| Swollen joint count (0-66)              | 1.8 (3.5)                              | 3.7 (6.0)                              | 3.7 (6.1) <sup>†</sup>    | 3.9 (7.0) <sup>†</sup>     | 3.6 (5.0) <sup>†</sup>               |
| SPARCC Enthesitis Index (1-16)          | 0                                      | 3.9 (3.0)                              | 2.1 (1.1)                 | 2.1 (1.4)                  | 6.2 (3.0) <sup>†</sup>               |
| Dactylitis, n (%)                       | 128 (8.2)                              | 50 (14.3)                              | 9 (12.7)                  | 22 (18.3) <sup>†</sup>     | 19 (12.0)                            |
| Dactylitis count (1-20)                 | 2.2 (1.7)                              | 2.5 (1.9)                              | 2.3 (1.4)                 | 3.1 (2.5)                  | 1.8 (1.0)                            |
| CDAI                                    | 10.8 (7.6)                             | 16.8 (11.3)                            | 14.4 (10.0) <sup>†</sup>  | 16.2 (12.3) <sup>†</sup>   | 18.4 (10.8) <sup>†</sup>             |
| BSA, % affected                         | 5.7 (11.5)                             | 6.0 (12.2)                             | 5.3 (8.8)                 | 5.7 (12.6)                 | 6.5 (13.1)                           |
| DAPSA                                   | 14.9 (13.1)                            | 28.4 (18.8)                            | 26.8 (19.0) <sup>†</sup>  | 22.8 (16.2) <sup>†</sup>   | 34.2 (19.5) <sup>†</sup>             |
| cDAPSA                                  | 12.0 (10.2)                            | 25.4 (18.3)                            | 21.7 (16.7) <sup>†</sup>  | 21.0 (17.1) <sup>†</sup>   | 30.5 (18.7) <sup>†</sup>             |
| Physician global assessment (VAS 0-100) | 16.0 (18.4)                            | 28.2 (21.2)                            | 22.3 (18.9) <sup>†</sup>  | 29.0 (22.8) <sup>†</sup>   | 30.3 (20.5) <sup>†</sup>             |
| Patient-reported pain (VAS 0-100)       | 35.0 (29.1)                            | 49.8 (27.2)                            | 42.8 (27.2) <sup>†</sup>  | 50.7 (28.7) <sup>†</sup>   | 52.3 (25.7) <sup>†</sup>             |
| Patient-reported fatigue (VAS 0-100)    | 37.4 (29.1)                            | 49.4 (27.6)                            | 43.8 (28.6) <sup>†</sup>  | 48.0 (29.2) <sup>†</sup>   | 52.9 (25.5) <sup>†</sup>             |

|                                          |             |             |                          |                          |                          |
|------------------------------------------|-------------|-------------|--------------------------|--------------------------|--------------------------|
| Patient global assessment<br>(VAS 0-100) | 37.4 (29.1) | 48.5 (27.7) | 50.1 (30.0) <sup>†</sup> | 46.6 (26.3) <sup>†</sup> | 49.2 (27.7) <sup>†</sup> |
| HAQ-DI (0-3)                             | 0.6 (0.6)   | 0.9 (0.6)   | 0.7 (0.6) <sup>†</sup>   | 0.8 (0.7) <sup>†</sup>   | 1.0 (0.6) <sup>†</sup>   |
| EQ-5D (0-1)                              | 0.8 (0.2)   | 0.7 (0.2)   | 0.8 (0.2) <sup>†</sup>   | 0.7 (0.2) <sup>†</sup>   | 0.7 (0.2) <sup>†</sup>   |
| EQ-VAS (0-100)                           | 73.6 (20.7) | 65.6 (21.1) | 70.0 (20.8) <sup>†</sup> | 65.8 (21.5) <sup>†</sup> | 63.6 (20.8) <sup>†</sup> |
| WPAI questionnaire domains               |             |             |                          |                          |                          |
| Current employment,<br>n (%)             | 939 (62.9)  | 210 (64.6)  | 46 (71.9)                | 82 (68.9)                | 82 (57.7)                |
| % Work time missed                       | 3.8 (14.3)  | 5.4 (14.0)  | 2.5 (8.3)                | 5.0 (15.0) <sup>†</sup>  | 7.5 (15.3) <sup>†</sup>  |
| % Impairment while<br>working            | 16.1 (21.4) | 25.3 (23.9) | 21.9 (24.5)              | 25.0 (24.2) <sup>†</sup> | 27.6 (23.3) <sup>†</sup> |
| % Overall work<br>impairment             | 17.7 (23.1) | 28.5 (26.0) | 23.6 (26.1)              | 28.2 (25.1) <sup>†</sup> | 32.0 (27.0) <sup>†</sup> |
| % Activity impairment                    | 24.4 (27.3) | 39.9 (29.5) | 30.3 (28.9)              | 40.8 (29.3) <sup>†</sup> | 43.4 (29.4) <sup>†</sup> |

\* All values are presented as mean (SD) unless otherwise stated. <sup>†</sup> p < 0.05 for comparison

between the overall or body location between the enthesitis groups and the no enthesitis group.

BSA: body surface area; CDAl: Clinical Disease Activity Index; cDAPSA: clinical Disease

Activity Index for Psoriatic Arthritis; DAPSA: Disease Activity Index for Psoriatic Arthritis; EQ-5D:

Euroqol 5-dimension scale; EQ-VAS: Euroqol Quality of Life visual analog scale; HAQ-DI:

Health Assessment Questionnaire Disability Index; MDA: modified minimal disease activity

(defined as meeting  $\geq 5$  of the following criteria: tender joint count  $\leq 1$ , swollen joint count  $\leq 1$ ,

BSA  $\leq 3\%$ , patient pain VAS  $\leq 15$ , patient global assessment VAS  $\leq 20$ , and HAQ-DI  $\leq 0.5$ );

PsA: psoriatic arthritis; QOL: quality of life; SpA: spondyloarthritis; SPARCC: Spondyloarthritis

Research Consortium of Canada; VAS: visual analog scale; WPAI: Work Productivity and

Activity Impairment.

**Supplementary Table 3.** Spearman correlation coefficients of SPARCC score with disease activity, QOL, and WPAI measures among patients with PsA and without fibromyalgia.

| <b>Variables</b>            | <b>N</b> | <b>Spearman Correlation Coefficient</b> | <b>p Values</b> |
|-----------------------------|----------|-----------------------------------------|-----------------|
| CDAI                        | 1762     | 0.256                                   | < 0.001         |
| HAQ-DI                      | 1765     | 0.215                                   | < 0.001         |
| DAPSA                       | 949      | 0.380                                   | < 0.001         |
| Modified MDA (total score)* | 1583     | -0.291                                  | < 0.001         |
| Patient-reported pain       | 1754     | 0.209                                   | < 0.001         |
| Patient-reported fatigue    | 1865     | 0.172                                   | < 0.001         |
| Patient global assessment   | 1880     | 0.270                                   | < 0.001         |
| BSA                         | 1796     | 0.027                                   | 0.247           |
| EQ5D                        | 1755     | -0.186                                  | < 0.001         |
| WPAI                        |          |                                         |                 |
| % Work time missed          | 957      | 0.119                                   | < 0.001         |
| % Impairment while working  | 1011     | 0.176                                   | < 0.001         |
| % Overall work impairment   | 892      | 0.189                                   | < 0.001         |
| % Activity impairment       | 1652     | 0.222                                   | < 0.001         |

\* This variable is the total score of the 6 criteria for modified MDA: tender joint count  $\leq 1$ , swollen joint count  $\leq 1$ , BSA  $\leq 3\%$ , patient pain VAS  $\leq 15$ , patient global assessment VAS  $\leq 20$ , and HAQ-DI  $\leq 0.5$ . BSA: body surface area; CDAI: Clinical Disease Activity Index; DAPSA: Disease Activity Index for Psoriatic Arthritis; EQ-5D: Euroqol 5-dimension scale; HAQ-DI: Health Assessment Questionnaire Disability Index; MDA: modified minimal disease activity (defined as meeting  $\geq 5$  of the following criteria: tender joint count  $\leq 1$ , swollen joint count  $\leq 1$ , BSA  $\leq 3\%$ , patient pain VAS  $\leq 15$ , patient global assessment VAS  $\leq 20$ , and HAQ-DI  $\leq 0.5$ ); QOL: quality of

Online supplement to: Disease Characteristics, Quality of Life, and Work Productivity by Enthesitis Site: Real-World Data From the US Corona Psoriatic Arthritis/Spondyloarthritis Registry. *The Journal of Rheumatology*. doi:10.3899/jrheum.191117

life; SPARCC: Spondyloarthritis Research Consortium of Canada; VAS: visual analog scale;

WPAI: Work Productivity and Activity Impairment.
